# Supplementary material for: Gastrointestinal lymphomas in a North American population: clinicopathologic features from one major Central-Midwestern United States tertiary care medical center
Source: Diagn Pathol. 2012 Jun 28;7:76. doi: 10.1186/1746-1596-7-76 (PMC3537672; doi:10.1186/1746-1596-7-76)
Supplement: Additional file 3 — Table S3. Immmunophenotype, P16 and P53 expression, proliferative index, clinical and molecular features in gastric lymphomas. [file 1746-1596-7-76-S3.xls]

## Sheet: Sheet1
Table 3. Immmunophenotype, P16 and P53 expression, proliferative index, clinical and molecular features in gastric lymphomas
	DLBCL, N=6	Ki-67	CD5	CD10	P16	P53	H.pylori	IGH	API2-MALT1		Stage
A1	DLBCL, stomach	>90%	0	0	2	2	N	N	N		IE
A2	DLBCL, stomach	0.8	0	0	0	1	N	N	N		IV
A3	DLBCL, stomach	>90%	0	0	0	2	N	N	N		IV
A4	DLBCL, stomach	1	0	0	1	2	N	N	N		IV
A5	DLBCL, stomach	0.9	0	0	2	2	N	N	N		IV
A6	DLBCL, stomach	>90%	0	0	0	2	N	N	N		II
	MALT, N=14	Ki-67	CD5	CD10	P16	P53	H. pylori	IGH	API2-MALT1		Stage
B1	MALT, stomach	<10%	0	0	0	0	N	N	N		ND
B2	MALT, stomach	<10%	0	0	0	0	N	N	P		I
B3	MALT, stomach **	50% **	0	0	0	2 **	N	N	N		I
B4	MALT, stomach	0.2	0	0	0	1	N	N	N		I
B5	MALT, stomach	<10%	0	0	0	0	N	N	N		I
B6	MALT, stomach	<10%	0	0	0	0	N	N	N		II
B7	MALT, stomach	0.15	0	0	0	0	N	N	P		IIE
B8	MALT, stomach	10-15%	0	0	0	1	N	N	P		IE
B9	MALT, stomach	0.1	0	0	0	0	N	N	N		ND
B10	MALT, stomach	<10%	0	0	1	0	P	N	N		IIIS
B11	MALT, stomach **	50% **	0	0	1	2 **	N	N	N		I
B12	MALT, stomach	<10%	0	0	0	0	N	N	P		II
B13	MALT, stomach	<10%	0	0	0	1	P	N	P		I
C1	MALT, SI	0.1	0	0	0	0	N	P	N		I
	Gastritis, N=3	Ki-67	CD5	CD10	P16	P53	H.pylori	IGH	API2-MALT1		Stage
D1	Gastritis, stomach	ND	ND	ND	1	0	P	ND	ND		ND
D2	Gastritis, stomach	ND	ND	ND	0	0	N	ND	ND		ND
D3	Gastritis, stomach	ND	ND	ND	0	0	N	ND	ND		ND
Table 3. Clinical, Immmunohistochemical and Molecular results of select gastrointestinal lymphomas (cont.)
N, Negative; P, Positive; ND, Not determined; SI, small intestine; DLBCL, diffuse large B cell lymphoma; MALT, extranodal
marginal zone lymphoma of mucosal associated lymphoid tissue; IGH, immunoglobulin heavy chain rearrangement
detected by FISH; API2-MALT1, API2-MALT1 rearrangement detected by FISH; H. pylori, Helicobacter pylori infection.
Grading for immunostains: 0, no staining to 5% positive; 1, > 5% to < 20% lesional cells positive;2, > 20% lesional cells positive
** MALT case with admixed large cells
